# Supplementary material
Source: PubMed Central journal article supplement (PMC3173750)

Web-based Supplementary Materials  
for  
Maximum likelihood estimation of long term  
HIV dynamic models and antiviral response  
by

Marc Lavielle  
INRIA Saclay, France

Adeline Samson  
CNRS UMR8145, Université Paris Descartes, France

Ana Karina Fermin  
Université de Nanterre, France

France Mentré  
INSERM U738 and Université Paris-Diderot, France

## Web Appendix A

The steady state values of model  $\mathcal{M}_B$  are given by:

$$T_{NI}(0) = \frac{\mu_I \mu_V}{p \gamma}, \quad (1)$$

$$T_I(0) = \frac{\mu_V V_I(0)}{p},$$

$$V_I(0) = \frac{\lambda - \mu_{NI} T_{NI}(0)}{\gamma T_{NI}(0)}, \quad (2)$$

$$V_{NI}(0) = 0$$

The steady state values of model  $\mathcal{M}_Q$  are given by:

$$\begin{aligned}
T_Q(0) &= \frac{\lambda + \rho T_{NI}(0)}{\alpha_Q + \mu_Q} \\
T_{NI}(0) &= \frac{\mu_V \mu_{NI}}{\gamma p} \\
T_I(0) &= \frac{\mu_V V_I(0)}{p} \\
V_I(0) &= \frac{\alpha_Q T_Q(0)}{\gamma T_{NI}(0)} - \frac{\rho + \mu_{NI}}{\gamma} \\
V_{NI}(0) &= 0
\end{aligned} \tag{3}$$

The steady state values of model  $\mathcal{M}_L$  are given by:

$$\begin{aligned}
T_{NI}(0) &= \frac{\mu_A \mu_V (\alpha_L + \mu_L)}{\gamma p (\alpha_L + \pi \mu_L)} \\
T_A(0) &= \frac{\mu_V V_I(0)}{p} \\
T_L(0) &= \frac{(1 - \pi) \gamma T_{NI}(0) V_I(0)}{\alpha_L + \mu_L} \\
V_I(0) &= \frac{\lambda - \mu_{NI} T_{NI}(0)}{\gamma T_{NI}(0)} \\
V_{NI}(0) &= 0.
\end{aligned} \tag{4}$$

## Web Appendix B

Algebraic conditions of parameters identifiability of the three dynamics models can not be found in a closed form. Thus, we decided to examine the identifiability problem by simulation, *i.e.* by performing some sensitivity analysis. We selected a set of parameter  $\theta^A = (\theta_1^A, \theta_2^A, \dots, \theta_{11}^A)$  (some typical values for a “responder”) and computed the predicted (log) viral load  $f_{\theta^A}(t)$  and the predicted CD4 cells count  $g_{\theta^A}(t)$  obtained with this set of parameters. Then, for  $k = 1, 2, \dots, 11$ ,

1. we modified the  $k$ th component of  $\theta^A$  by setting  $\tilde{\theta}_k^A = 0.7 \times \theta_k^A$ ,
2. we created a new set of parameters  $\tilde{\theta}^A$  by modifying  $\theta^A$  “as less as possible” and such that  $f_{\tilde{\theta}^A}$  and  $g_{\tilde{\theta}^A}$  are “as close as possible” to  $f_{\theta^A}$  and  $g_{\theta^A}$ .

The table displays  $\theta^A$  and 3 different set of parameters  $\tilde{\theta}^A$  that give the same predicted viral loads and CD4 counts:

|              |          |                 |               |              |
|--------------|----------|-----------------|---------------|--------------|
| $\lambda$    | 2.5      | 2.5             | 2.5           | 2.5          |
| $\gamma$     | 0.00225  | <b>0.001575</b> | 0.00225       | 0.00225      |
| $\pi$        | 0.46     | <b>0.46853</b>  | 0.46          | 0.46         |
| $\alpha_L$   | 1.5e-005 | 1.5e-005        | 1.5e-005      | 1.5e-005     |
| $p$          | 620      | <b>629.25</b>   | <b>434</b>    | 620          |
| $\mu_{NI}$   | 0.008    | 0.008           | 0.008         | 0.008        |
| $\mu_L$      | 0.008    | 0.008           | 0.008         | 0.008        |
| $\mu_A$      | 0.3      | <b>0.30156</b>  | 0.3           | 0.3          |
| $\mu_V$      | 30       | 30              | <b>21.006</b> | 30           |
| $\eta_{PI}$  | 0.95     | <b>0.9081</b>   | 0.95          | <b>0.665</b> |
| $\eta_{RTI}$ | 0.92     | 0.92            | 0.92          | <b>0.988</b> |

We repeated this analysis with another set of parameters  $\theta^B$  (some typical values for a “non responder”). The table below displays  $\theta^B$  and 3 different set of parameters  $\tilde{\theta}^B$  that give the same predicted viral loads and CD4 counts:

|              |          |                 |               |               |
|--------------|----------|-----------------|---------------|---------------|
| $\lambda$    | 2.5      | 2.5             | 2.5           | 2.5           |
| $\gamma$     | 0.00225  | <b>0.001575</b> | 0.00225       | 0.00225       |
| $\pi$        | 0.46     | <b>0.46644</b>  | 0.46          | 0.46          |
| $\alpha_L$   | 1.5e-005 | 1.5e-005        | 1.5e-005      | 1.5e-005      |
| $p$          | 620      | <b>724.91</b>   | <b>434</b>    | 620           |
| $\mu_{NI}$   | 0.008    | 0.008           | 0.008         | 0.008         |
| $\mu_L$      | 0.008    | 0.008           | 0.008         | 0.008         |
| $\mu_A$      | 0.3      | <b>0.34932</b>  | 0.3           | 0.3           |
| $\mu_V$      | 30       | 30              | <b>20.997</b> | 42.849        |
| $\eta_{PI}$  | 0.3      | <b>0.16081</b>  | 0.3           | <b>0.2</b>    |
| $\eta_{RTI}$ | 0.3      | 0.3             | 0.3           | <b>0.3798</b> |

In other words,

- $\gamma$ ,  $\pi$ ,  $p$ ,  $\mu_A$  and  $\eta_{PI}$  are not identifiable simultaneously,
- $p$  and  $\mu_V$  are not identifiable simultaneously,
- $\eta_{PI}$  and  $\eta_{RTI}$  are not identifiable simultaneously.

Figure 1 displays  $f_{\theta^A}$  and  $g_{\theta^A}$  in blue and  $f_{\tilde{\theta}^A}$  and  $g_{\tilde{\theta}^A}$  in green. Figure 2 displays  $f_{\theta^B}$  and  $g_{\theta^B}$  in blue and  $f_{\tilde{\theta}^B}$  and  $g_{\tilde{\theta}^B}$  in green.

Figure 1: Predicted viral load and CD4 cell count profiles obtained with different set of parameters (responder profiles)

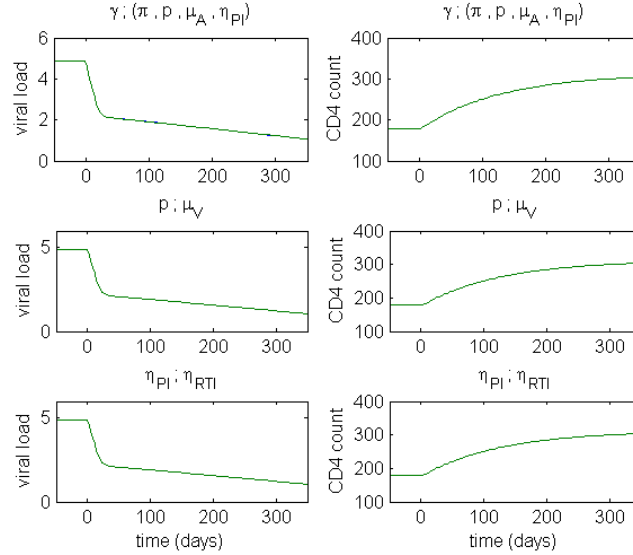

This sensitivity analysis only considers the problem of fitting the structural model for a given subject. This method is not completely appropriate for a population approach where the distribution of the individual parameters is also part of the (statistical) model. In other words, if a parameter is not algebraically (or structurally) identifiable, it can be statistically identifiable. Consider the following “toy example”:

$$y_{ij} = A_i t_{ij} + B_i t_{ij} + \varepsilon_{ij}$$

This model is clearly not algebraically identifiable. Assuming now that  $A_i$  and  $B_i$  are random variables, statistical identifiability of the population parameters depends on the population distribution of  $A_i$  and  $B_i$ . We see in Figure 3 the convergence of the SAEM algorithm for different initializations and different distributions. The population parameters  $A$  and  $B$  are not identifiable when  $A_i$  and  $B_i$  are normally distributed. They are identifiable when  $A_i$  and  $B_i$  are defined using a logit transformation.

In our viral kinetic model, even if only the product  $(1 - \eta_{PI})(1 - \eta_{RTI})$  is structurally identifiable, both  $\eta_{PI}$  and  $\eta_{RTI}$  are statistically identifiable.

In summary, identifiability of non linear mixed effects models does not reduce to algebraic identifiability and practical identifiability should also be

Figure 2: Predicted viral load and CD4 cell count profiles obtained with different set of parameters (non responder profiles)

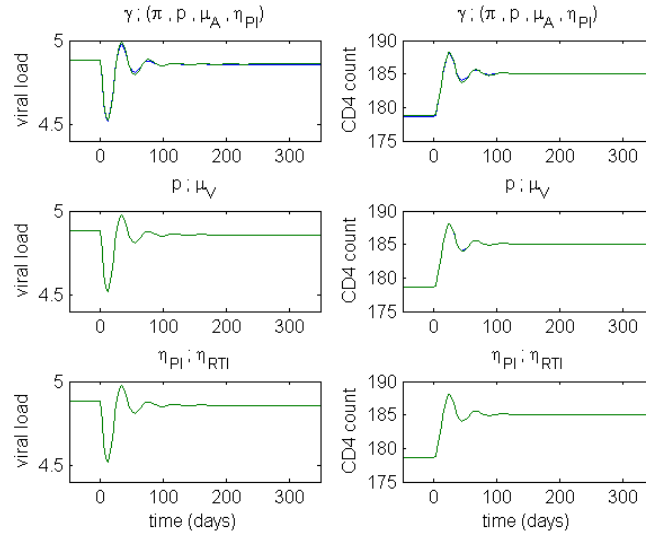

addressed. As a practical diagnostic tool, we propose to use the Fisher Information Matrix for detecting some over-parametrization in the model. We are aware that it is not completely satisfactory but from our experience, we know for certain that very large s.e. (or NaN) indicate some issue in the parametrization. Unfortunately, the reverse is not necessarily true.

Figure 3: Convergence of SAEM with different initial values and different population distributions. Left: normal distribution ( $A + B$  is identifiable) , Right: logit transformation (both  $A$  and  $B$  are identifiable).

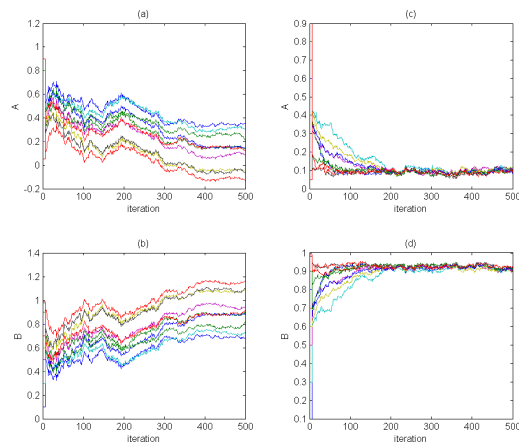

Supplement: halms486937-supplement_1.pdf [file halms486937-supplement_1.pdf]
